# Supplementary material for: Silver ions induced growth of plasmonic Au hexagonal star plates
Source: Royal Society of Chemistry journal article supplement (doi:10.1039/d4tc00703d), 2024-01-01
Supplement: d4tc00703d1.pdf [file d4tc00703d1.pdf]

## Supplementary Information

### Silver Ions Induced Growth of Plasmonic Au Hexagonal Star plates

Lingbo Tong,<sup>a</sup> Xinlei Zhang,<sup>a</sup> Huan Chen,<sup>\*a</sup> Xiaohu Mi,<sup>\*b</sup> Jinping Li,<sup>a</sup> Zhenglong Zhang<sup>a</sup>

<sup>a</sup> School of Physics and Information Technology, Shaanxi Normal University, Xi'an 710062, China. E-mail:

*hchen@snnu.edu.cn*

<sup>b</sup> Shaanxi University of Chinese Medicine, Xi'an 712046, China. E-mail: *xhmi@sntcm.edu.cn*

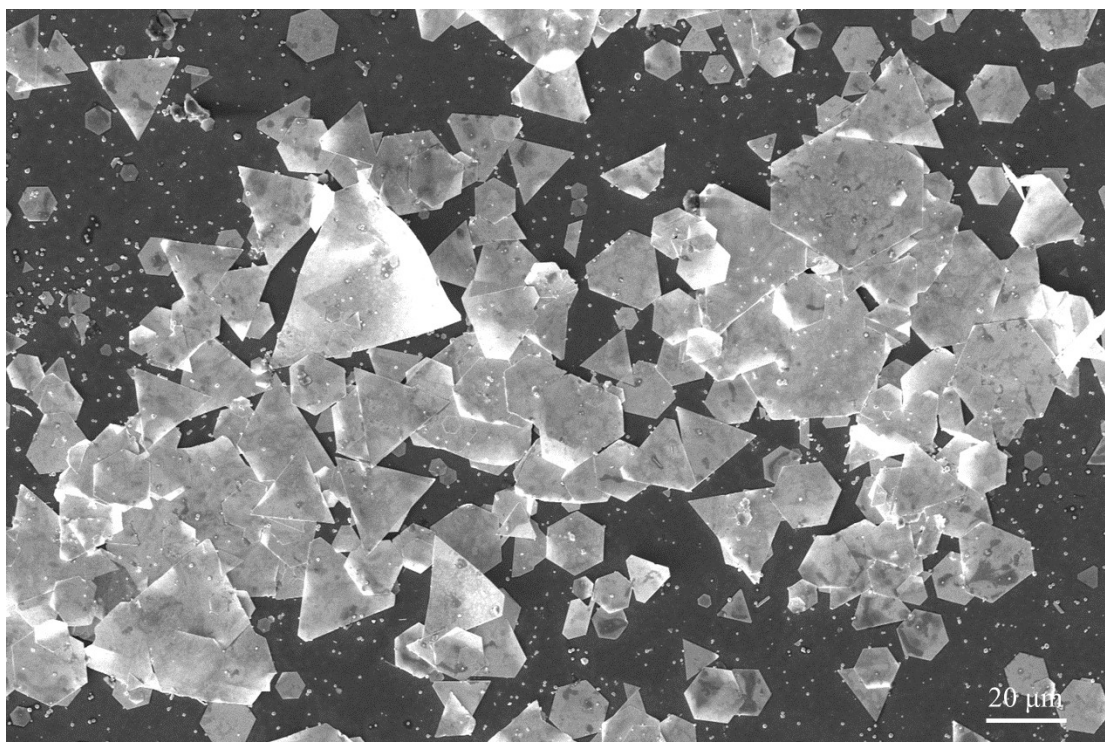

**Figure S1.** Representative SEM image of Au plates which have not added AgNO<sub>3</sub> in the process of synthesis at low magnification.

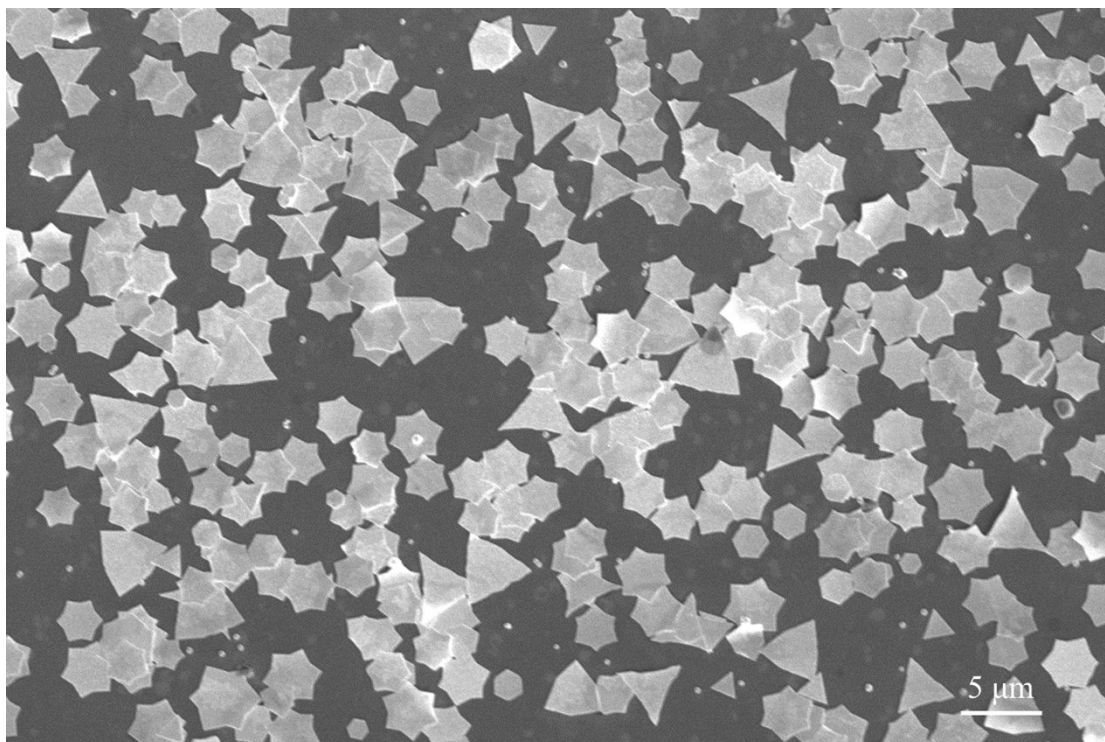

**Figure S2.** Representative SEM image of Au plates which added  $\text{AgNO}_3$  in the process of synthesis at low magnification.

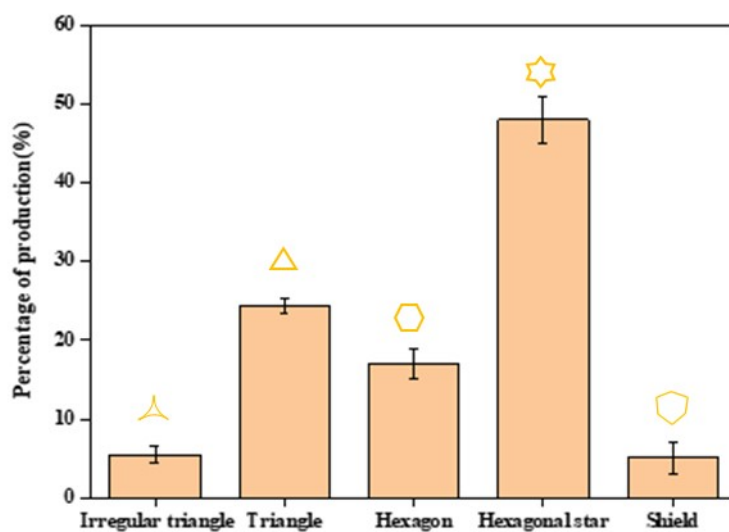

**Figure S3.** The yield of different kinds of Au plates.

Map

| Element | At. No. | Netto      | Mass [%]      | Mass Norm. [%] | Atom [%]      | abs. error [%]<br>(1 sigma) | rel. error [%]<br>(1 sigma) |
|---------|---------|------------|---------------|----------------|---------------|-----------------------------|-----------------------------|
| Gold    | 79      | 22684      | 99.87         | 99.87          | 99.77         | 10.05                       | 10.06                       |
| Silver  | 47      | 3          | 0.13          | 0.13           | 0.23          | 0.10                        | 77.16                       |
|         |         | <b>Sum</b> | <b>100.00</b> | <b>100.00</b>  | <b>100.00</b> |                             |                             |

**Fig. S4.** EDX elemental mapping analysis of the elements content in Figure 1d-e.

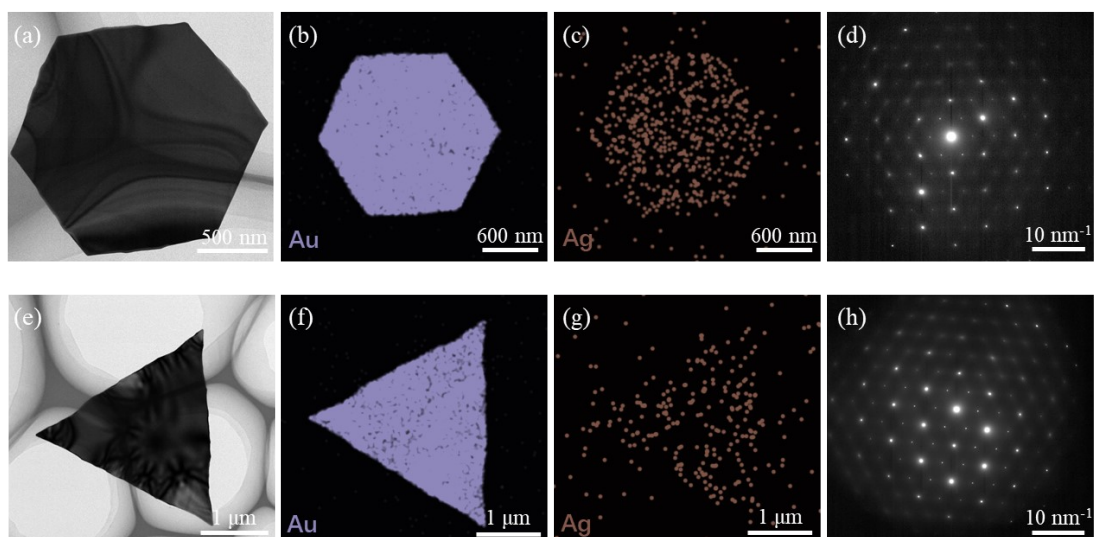

**Figure S5.** (a). HRTEM image of the Au hexagon plate. (b) and (c). STEM-EDX elemental mapping images of the Au hexagon plate. (d). SAED pattern of the Au hexagon plate. (e). HRTEM image of the Au triangle plate. (f) and (g). STEM-EDX elemental mapping images of the Au triangle plate. (h). SAED pattern of the Au triangle plate.

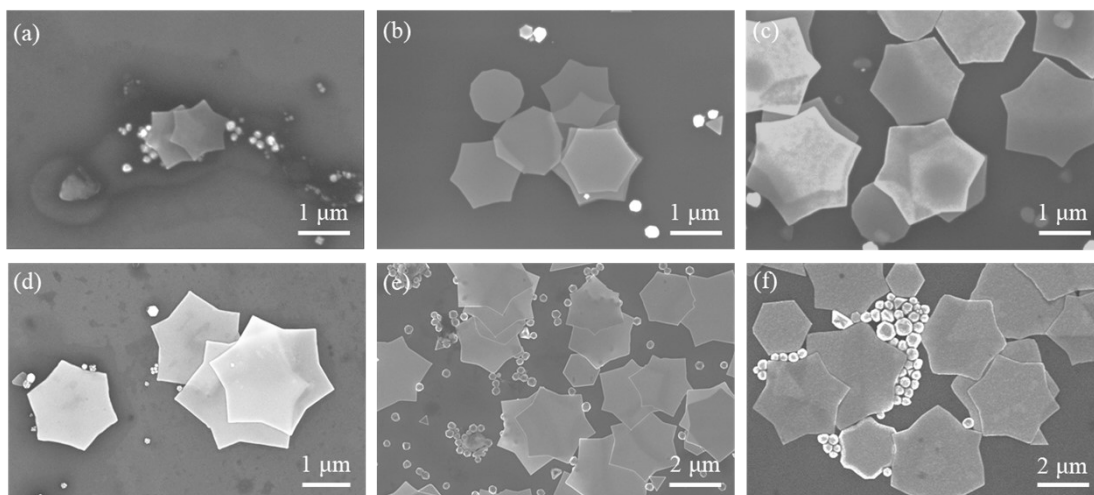

**Fig S6.** Representative SEM images of Au plates which produced at different reaction time at low magnification. (a) 6 h, (b) 12 h, (c) 18 h, (d) 24 h, (e) 30 h, (f) 36 h.

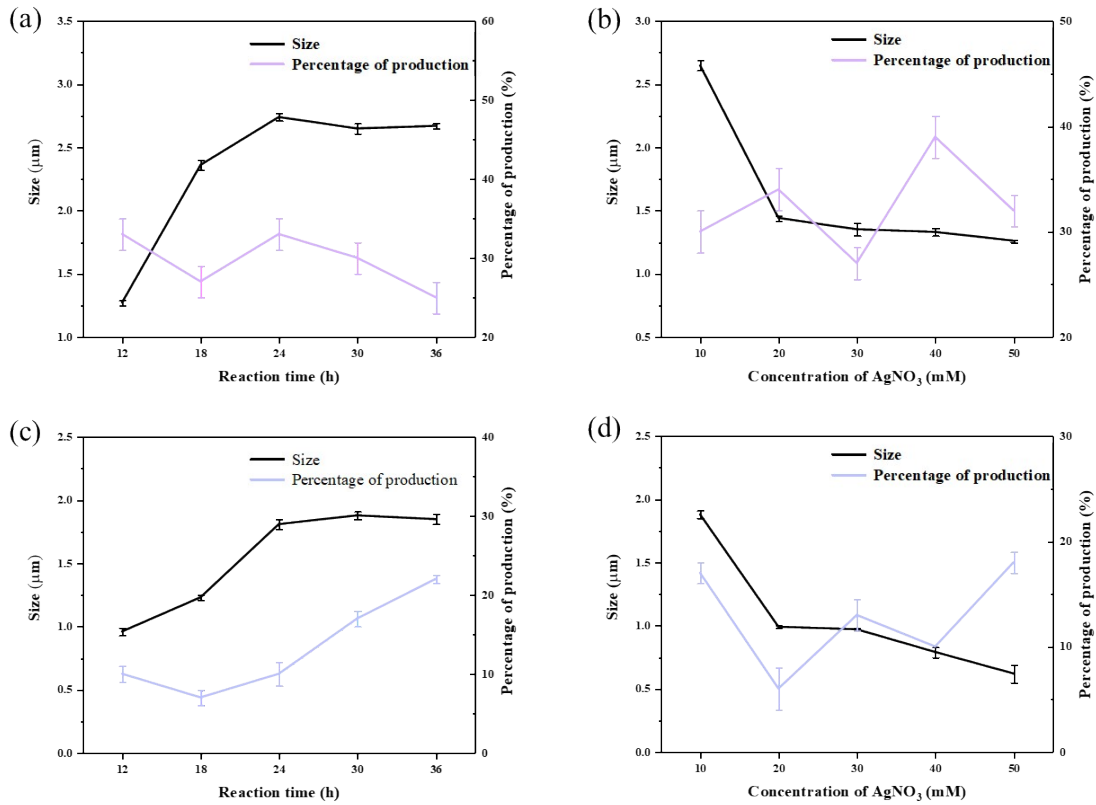

**Figure S7.** (a). The size and the yield of Au triangle plates at different reaction time. (b). The size and the yield of Au triangle plates at different concentration of  $\text{AgNO}_3$ . (c). The size and the yield of Au hexagon plates at different reaction time. (d). The size and the yield of Au hexagon plates at different concentration of  $\text{AgNO}_3$ .

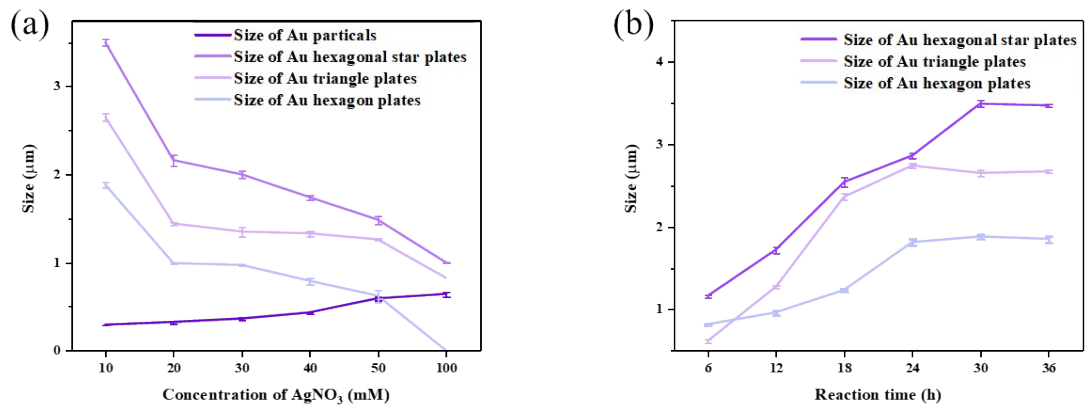

**Figure S8.** (a). The size of Au particles and different kinds of Au plates at different concentration of  $\text{AgNO}_3$ . (b). The size of different kinds of Au plates at different reaction time.

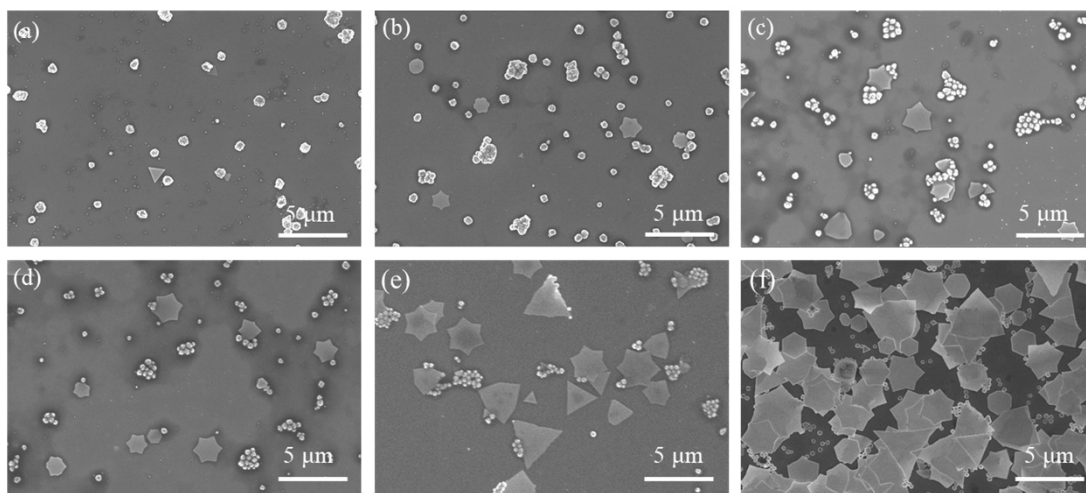

**Figure S9.** Representative SEM images of samples which produced at different  $\text{AgNO}_3$  concentrations at low magnification. (a) 100 mM, (b) 50 mM, (c) 40 mM, (d) 30 mM, (e) 20 mM, (f) 10 mM.

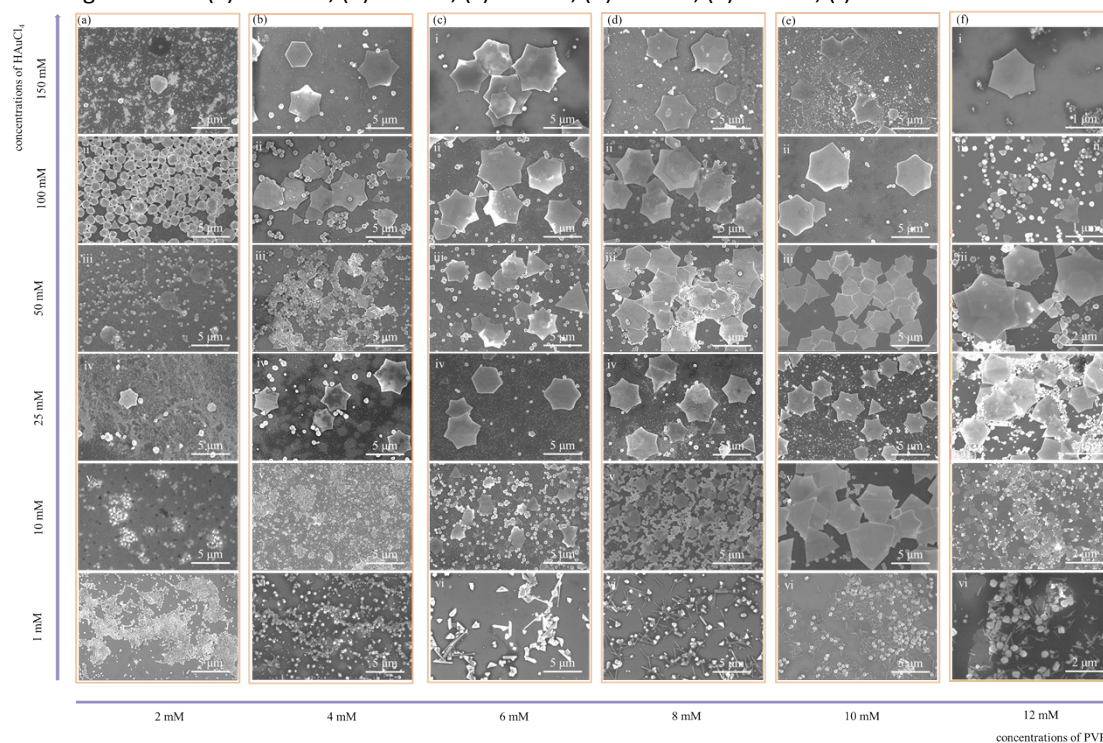

**Figure S10.** SEM images of Au nanostructure which produced at different concentrations of PVP (from 2 mM to 12 mM) and  $\text{HAuCl}_4$  (from 1 mM to 150 mM). SEM images Correspond with Figure 3.

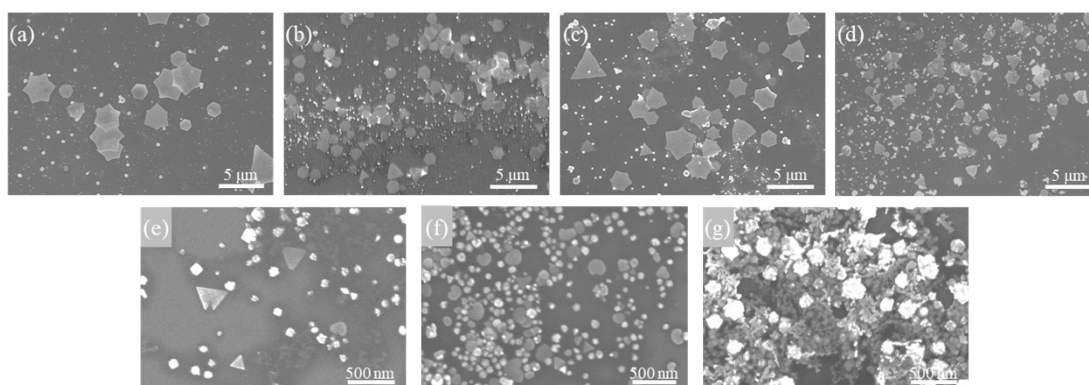

**Figure S11.** SEM images of Au nanostructure which produced at different PH value. (a) PH=2, (b) PH=4, (c) PH=6,

(d) PH=7, (e) PH=8, (f) PH=10, (g) PH=12.

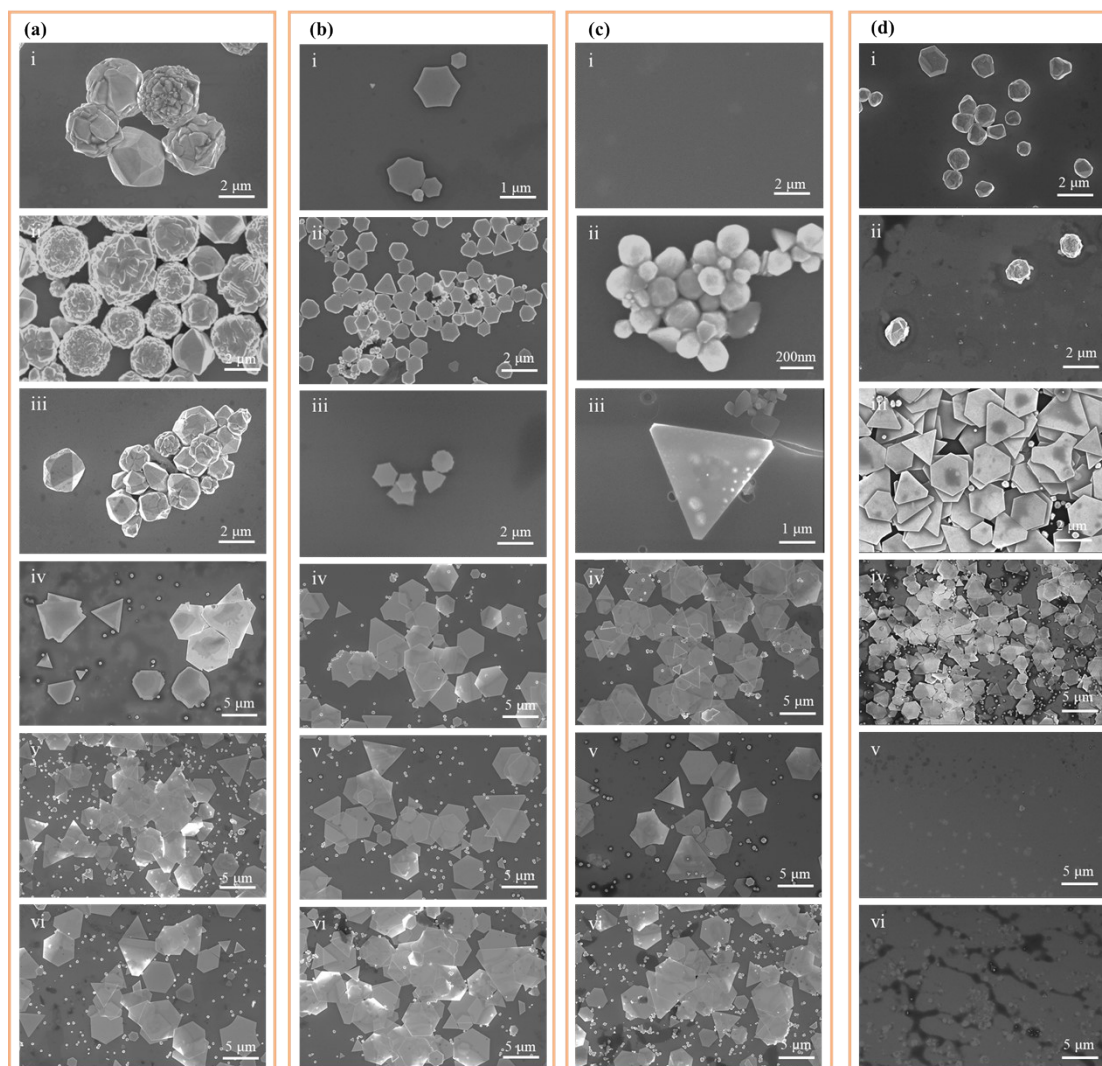

**Figure S12.** SEM images of the product of the reaction using other ionic with different concentrations, (a) KI, (b) KBr, (c) CuCl<sub>2</sub>, (d) FeCl<sub>3</sub>. i –vi are SEM images of different concentration, 100 mM, 50 mM, 10 mM, 1 mM, 0.1 mM, 0.01 mM.
